# Supplementary material for: Cortical excitability signatures for the degree of sleepiness in human
Source: eLife. 2021 Jul 27;10:e65099. doi: 10.7554/eLife.65099 (PMC8373378; doi:10.7554/eLife.65099)
Supplement: Source data 1. [file elife-65099-supp1.xlsx]

## Sheet: TMS
Subject	Gender	Age	SSS								MT								MEPL								SICI								ICF								SICF
			0	4	10	16	21	24	28	34	0	4	10	16	21	24	28	34	0	4	10	16	21	24	28	34	0	4	10	16	21	24	28	34	0	4	10	16	21	24	28	34	0	4	10	16	21	24	28
1A	M	23	2	1	3	1	4	5	4	3	0.55	0.45	0.45	0.38	0.35	0.33	0.43	0.43	21.94	22.6	22.22	24.26	22.68	22.92	22.4	22.48	0.2425	0.2331	0.2887	0.4139	0.5144	0.4646	1.1262	0.4679	0.4791	1.1748	0.8661	0.7799	0.1846	0.2757	0.602	0.6667	1.1133	1.1128	1.4331	1.4131	1.055	1.3305	2.1538
1B	M	22	3	1	2	3	4	6	6	5	0.41	0.41	0.43	0.35	0.3	0.3	0.38	0.35	22.86	22.4	22.76	22.24	22.64	22.46	22.6	21.76	0.1724	0.2449	0.3891	0.3148	0.1828	0.3064	0.5654	0.3565	0.5862	1.9592	1.7071	1.5417	2.7323	1.6301	1.7171	0.7533	1.2184	0.9388	1.1297	1.6852	1.2593	1.4479	1.5362
2A	M	21	2	1	3	2	5	5	2	3	0.53	0.6	0.7	0.69	0.75	0.68	0.75	0.72	23.54	24.04	23.18	24.82	23.76	24.02	25.22	24.48	0.17	0.2644	0.3909	0.4358	0.4812	0.4673	0.3362	0.5812	0.644	0.572	0.5848	1.1976	1.6912	1.3228	1.0582	1.2005	1.0089	1.5202	1.5615	1.272	1.3928	2.0267	1.5657
2B	M	23	1	2	3	2	4	5	4	4	0.41	0.5	0.46	0.39	0.36	0.56	0.43	0.51	22.74	22.7	22.78	22.76	23.86	23.84	23.32	23.52	0.0918	0.6489	0.1443	0.138	0.3925	0.1829	0.3515	0.2987	0.5867	0.8213	1.6466	1.5076	1.0912	0.9942	1.0484	1.46	1.0034	1.1495	1.3321	1.6247	0.902	1.1469	1.182
3A	M	25	4	1	1	1	4	3	6	6	0.45	0.34	0.5	0.53	0.5	0.62	0.56	0.4	24.38	23.92	23.72	24.74	25.04	25.44	24.94	25.24	0.8008	0.1937	0.6016	0.2579	0.5722	0.681	0.5279	0.5612	1.1587	0.5565	0.9018	1.4642	1.2326	0.9572	0.7202	0.7613	1.3472	1.4134	1.713	0.9317	1.4029	1.8872	1.4907
3B	F	24	4	1	3	2	2	3	3	3	0.48	0.53	0.45	0.43	0.42	0.45	0.56	0.4	20.64	20.34	20.76	20.9	21.86	20.9	24.94	25.24	0.188	0.9087	0.2327	0.4981	0.3443	0.4778	0.5279	0.5612	1.5373	1.1554	1.1264	1.2222	1.5909	1.8086	0.7202	0.7613	1.1488	1.0889	1.3161	1.7335	1.646	1.4494	1.4907
4A	F	21	4	2	2	1	3	5	4	3	0.7	0.73	0.76	0.72	0.75	0.74	0.75	0.77	22.56	22.32	22.14	20.68	21.54	22.68	21.34	22.54	0.5877	0.4229	0.2927	0.9814	0.6612	0.4425	0.5555	0.4222	2.5036	2.1511	1.6192	2.6771	1.5257	1.7478	1.2543	1.9539	2.0035	2.0205	2.2905	1.3275	0.9259	1.857	1.8197
4B	M	21	2	2	1	3	4	5	5	3	0.31	0.35	0.3	0.4	0.36	0.36	0.32	0.37	20.84	19.64	19.84	20.26	21.42	21.16	20.22	19.8	0.4866	0.3818	0.4597	0.5134	0.3501	0.5643	0.4686	0.4926	0.8625	0.8317	0.5036	0.5181	0.5969	1.0069	0.9933	0.5349	1.0782	1.6073	1.1652	1.3759	1.5104	1.1802	1.4552
5A	F	20	3	2	1	2	3	4	3	2	0.45	0.36	0.39	0.35	0.43	0.36	0.4	0.35	19.08	18.6	19.36	19.56	20.12	20.26	20.1	19.96	0.4866	0.3818	0.4597	0.5134	0.3501	0.5643	0.4686	0.4926	0.258	0.7661	0.4761	1.4174	1.2725	0.5774	0.7469	1.3167	1.3639	1.4592	1.4488	1.0571	1.6538	2.0327	1.4923
5B	M	20	3	2	2	2	3	4	3	4	0.33	0.25	0.28	0.31	0.25	0.35	0.25	0.24	20.56	21.18	20.74	20.36	20.18	20.92	20.74	20.48	0.5135	0.3846	0.3354	0.5163	0.4474	0.5532	0.2136	0.2799	1.8664	1.5734	1.3244	1.4144	1.1282	2.5943	1.3229	0.8929	1.0289	1.8486	1.1989	1.4277	1.3011	1.4892	1.4106
6A	F	22	3	2	1	1	3	4	1	2	0.7	0.56	0.58	0.55	0.6	0.5	0.55	0.6	21.96	22.04	22.34	22.26	22.72	22.06	21.98	22.64	0.2193	0.234	0.2444	0.347	0.3889	0.7162	0.2358	0.2206	1.6906	0.7361	0.5923	1.6768	1.3041	0.408	1.8278	1.1951	1.3946	1.0349	2.0397	1.4228	1.4975	1.3488	1.2302
6B	M	22	3	2	2	3	4	5	3	2	0.47	0.45	0.41	0.47	0.45	0.45	0.45	0.49	21.54	21.48	23.26	21.8	21.92	21.44	21.64	22.12	0.6034	0.4898	0.2881	0.3247	0.5096	0.7014	0.3338	0.3734	1.2752	0.8402	0.937	0.9871	1.2634	1.6348	1.4563	1.1318	1.3497	1.0262	1.0962	1.0345	1.1606	0.9255	1.2129
7A	F	21	1	2	2	3	2	3	3	3	0.44	0.45	0.4	0.35	0.33	0.36	0.33	0.3	20.3	19.58	19.24	19.74	20.22	20.08	19.76	19.44	0.4802	0.4408	0.1488	0.3375	0.185	0.0457	0.2523	0.5026	1.0649	1.3739	1.332	1.313	1.1423	1.3112	1.8192	1.1066	1.413	1.3087	1.2949	0.9997	1.1402	1.0901	1.5064
7B	F	21	1	1	1	2	2	3	4	2	0.45	0.36	0.39	0.35	0.43	0.36	0.4	0.35	19.74	19.64	19.94	19.94	19.86	19.56	19.92	20.08	1.047	0.1841	0.3184	0.4812	0.4774	0.6452	0.4648	0.3085	1.4426	1.6002	1.159	1.4201	1.407	1.6964	1.238	1.1044	1.4992	1.8021	1.2267	1.0868	1.7141	1.8293	2.492
8A	M	22	3	2	2	2	4	4	3	2	0.37	0.36	0.27	0.28	0.35	0.38	0.35	0.36	20.44	20.12	19.86	20.76	21.2	20.48	19.98	19.92	0.515	0.5307	0.6689	0.2498	0.5778	0.292	0.643	1.0145	0.8749	1.7729	2.275	1.723	1.4193	1.6228	1.6404	1.7042	2.7181	1.4158	1.4173	2.2107	1.3399	2.4657	1.851
8B	M	23	2	1	2	2	3	5	3	3	0.35	0.4	0.38	0.29	0.38	0.35	0.29	0.3	22.5	21.8	23.16	22.66	23.16	23	22.32	22.54	0.4637	0.6852	0.477	0.2102	0.3391	0.3409	0.3138	0.4746	0.6102	1.2443	1.0008	0.9593	1.4403	1.7337	1.0638	0.7007	1.7745	1.4827	2.4746	1.3524	1.2107	1.2051	1.0065
9A	F	22	1	2	4	4	5	6	4	3	0.41	0.4	0.36	0.41	0.36	0.35	0.38	0.32	18.98	18.3	18.64	19.02	19.52	18.98	18.78	18.62	0.7482	0.3148	0.333	0.2753	0.2364	0.5732	0.2867	0.2918	1.2504	1.7326	1.1805	1.4534	0.898	1.6183	1.2523	1.0922	1.445	0.6745	1.0581	1.2534	1.6778	1.2128	1.0087
9B	F	22	3	2	3	4	6	6	3	2	0.62	0.55	0.63	0.51	0.58	0.45	0.45	0.48	21.46	21.64	22	21.74	21.92	22.02	21.48	21.84	0.6051	0.4964	0.9245	0.43	0.3058	0.6596	0.4653	0.5072	0.8516	2.29475	1.6728	0.7904	0.6172	1.3334	0.4371	1.0592	1.6781	1.3595	1.4966	1.1547	1.7233	2.4084	1.8636
10A	F	27	5	2	3	2	3	6	3	3	0.46	0.41	0.45	0.47	0.42	0.44	0.46	0.42	20.16	20.1	19.76	19.24	20.18	20.38	20.38	20.44	0.4135	0.1557	0.2359	0.1688	0.0792	0.2128	0.2635	0.4926	0.1224	0.7649	0.8647	1.8564	2.4501	1.9027	1.7112	1.1759	3.0553	2.0192	2.3046	1.5696	2.05	1.5992	1.8792
10B	M	22	3	1	3	2	4	5	5	3	0.67	0.66	0.64	0.6	0.67	0.62	0.6	0.64	22.44	22	21.36	21.14	21.7	21.44	21.32	21.36	0.6073	0.642	0.3049	0.7009	0.4503	0.3219	0.5059	0.7888	0.507	0.8806	1.1305	0.9874	0.5219	1.4736	0.2118	0.413	1.3309	2.1499	2.4396	1.9554	1.9541	2.5798	1.8017
11A	M	21	3	2	2	2	3	7	7	7	0.45	0.5	0.5	0.45	0.49	0.43	0.41	0.4	24.74	23.58	24.24	23.04	23.58	23.54	23.98	23.5	0.349	0.9254	0.533	1.0829	0.5373	0.3448	0.4914	0.4347	0.9687	0.7932	1.4304	1.7654	0.8778	0.9619	1.1292	1.134	0.8045	1.3007	1.5464	1.346	1.1092	1.4985	1.2167
11B	M	21	3	1	2	3	4	5	3	2	0.5	0.47	0.43	0.44	0.48	0.48	0.45	0.37	22.1	20.2	20.02	20.34	21.06	20.54	19.76	20.1	0.9586	1.6539	1.225	0.2785	0.6037	0.4464	1.4426	1.3252	1.5451	1.9159	1.4066	1.6352	1.5256	1.4482	2.0976	0.7178	2.258	3.2225	2.4938	3.7764	2.7158	4.2716	2.4121
12B	F	28	3	4	4	3	4	3	5	6	0.3	0.33	0.35	0.38	0.38	0.38	0.38	0.48	18.92	19.48	19.68	20.2	19.86	20.16	19.86	20.48	1.1594	0.6596	0.4057	0.4151	0.5408	0.6823	0.386	0.7455	1.6311	1.5159	1.5477	1.3672	1.7219	1.8199	1.3323	1.7003	1.3422	2.969	1.8019	1.7022	2.0277	1.3774	2.5995
13B	F	22	2	1	4	2	4	3	3	4	0.58	0.34	0.42	0.47	0.41	0.35	0.4	0.4	21.94	21.88	21.78	21.28	22.32	22.32	21.12	21.64	0.234	0.386	0.088	0.2533	0.1124	0.0825	0.285	0.1416	1.2595	0.9735	0.7016	1.1895	0.4754	1.1537	1.3283	0.7177	1.3799	1.2051	1.2183	1.3581	1.4056	1.2305	1.2799
14A	F	22	3	3	3	3	4	3	4	5	0.65	0.61	0.67	0.66	0.74	0.7	0.62	0.8	22.54	21.34	21.08	21.68	22.4	22	22.1	22.36	0.1393	0.1674	0.1462	0.0248	0.1134	0.3099	0.0785	0.6248	1.6977	1.6583	2.5765	2.0979	4.9637	1.7274	2.8015	2.5048	1.7798	1.0834	1.6907	1.014	1.5355	1.4491	1.3408
14B	F	22	1	1	2	2	3	4	5	5	0.6	0.47	0.47	0.54	0.55	0.54	0.55	0.58	21.06	20.52	20.8	20.2	21.2	20.64	21.4	20.96	0.7511	0.6252	1.0865	0.1016	0.2236	0.3676	0.3088	0.4277	1.5811	1.2323	0.703	1.8716	1.4269	2.2498	1.2702	1.5238	0.9858	1.4414	1.3992	3.2521	1.2582	1.2721	1.188
15A	M	22	1	2	2	2	3	4	3	2	0.42	0.35	0.31	0.48	0.51	0.44	0.44	0.5	24.08	25.84	23.72	23.56	24.74	24.6	23.88	22.86	0.3068	0.4545	0.1726	0.1179	0.073	0.1002	0.2955	0.1307	1.3741	1.6469	0.442	1.6278	1.1504	1.3662	1.0094	1.1638	1.3377	1.8391	1.6396	1.1462	0.9978	0.8796	1.1494
15B	M	22	2	1	2	2	3	3	2	2	0.57	0.57	0.54	0.53	0.55	0.53	0.5	0.5	21.06	21	20.84	20.92	21.48	21.6	21.58	21.14	0.6271	0.306	0.6277	0.3094	0.4402	0.5674	0.7819	0.6324	1.4703	2.1721	2.08	0.8561	1.598	2.0254	1.7419	1.8603	1.5205	1.8849	1.3943	1.6356	1.3048	1.474	3.1085
16A	M	25	4	3	5	2	4	7	6	4	0.53	0.37	0.37	0.4	0.47	0.42	0.38	0.46	23.2	22.92	23.34	23.22	23.72	24.2	23.78	23.22	0.2317	0.2734	0.3035	0.1348	0.2604	0.2341	0.425	0.4254	0.6721	0.3749	1.5584	1.9189	2.3428	2.5518	1.04	2.6219	1.8943	1.0298	2.1148	3.563	1.6683	2.8135	3.6404
16B	M	24	3	1	1	2	4	5	5	5	0.45	0.44	0.4	0.42	0.51	0.5	0.43	0.62	20.7	21.26	20.64	20.52	21.86	21.6	21.78	20.74	0.7997	0.8335	0.876	1.1964	0.723	0.8649	1.0292	0.6898	0.72	0.9523	0.8612	0.8443	1.0716	0.9346	0.7367	1.8384	3.6241	3.152	3.0152	2.6992	2.8843	2.3641	1.921
17A	F	23	4	3	2	3	4	4	3	2	0.45	0.31	0.41	0.3	0.33	0.3	0.32	0.27	21.62	21.8	21.34	21.34	21.96	21.74	21.32	21.18	0.1419	0.0741	0.1301	0.0456	0.1053	0.0927	0.1084	0.1021	0.8284	0.3851	1.2313	0.9565	0.9411	1.1485	0.9508	1.7765	1.5428	1.5883	1.6282	1.6566	2.2941	1.3444	1.4314
17B	F	22	6	1	1	4	5	5	3	3	0.4	0.33	0.33	0.34	0.37	0.43	0.43	0.39	21.3	21.32	20.74	20.48	21	21.16	20.7	20.7	0.4454	0.3253	0.2132	0.6001	0.3428	0.1689	0.1637	0.2721	2.1356	2.4294	1.8073	2.9159	3.5776	1.3075	2.0157	2.4635	2.0055	1.7475	1.9675	2.0831	1.8845	0.9437	1.9917
18A	M	23	2	2	2	2	4	5	4	3	0.45	0.35	0.34	0.31	0.31	0.31	0.44	0.37	23.24	22.62	22.38	22.26	22.38	22.82	22	21.92	0.2962	0.2519	0.2516	0.2678	0.3907	0.08	0.2067	0.1425	1.8212	1.9719	1.8668	1.3312	1.0198	1.2185	1.5852	1.1677	2.0322	1.5295	1.8509	1.395	1.4626	2.0055	1.1625
18B	F	22	3	2	1	2	4	3	3	4	0.4	0.35	0.31	0.3	0.35	0.35	0.41	0.3	20.38	21.02	21.06	20.28	21.2	21.36	20.88	21.2	0.6322	0.6	0.3391	0.2557	0.3528	0.3528	0.401	0.4925	1.2704	1.5853	1.6405	1.5022	1.0696	1.2285	1.2707	1.7341	2.4375	1.6913	1.7261	2.1597	1.158	1.9276	1.3121
19A	M	21	2	2	2	2	4	5	4	3	0.63	0.55	0.55	0.62	0.7	0.66	0.55	0.47	21.46	21.66	21.38	21.26	22.18	21.72	21.14	20.9	0.5554	0.564	0.493	0.4805	0.4618	0.3495	0.363	0.4864	1.4761	1.6091	1.572	1.8023	2.4427	1.8203	2.4254	2.6968	1.5719	2.2464	1.6871	2.0368	1.9356	3.0293	2.5089
19B	F	23	3	3	1	2	4	3	2	1	0.49	0.35	0.36	0.35	0.35	0.35	0.28	0.26	19.26	18.82	19	19.58	19.64	19.28	19.28	19.74	0.5525	0.3383	0.4368	0.2765	0.2288	0.6911	0.447	0.2898	1.1818	0.9497	0.7396	0.9651	0.814	1.143	0.8209	0.9356	1.6008	1.4683	1.5515	1.7429	1.5083	1.4646	1.6693
20A	M	25	3	2	5	5	6	6	5	2	0.58	0.57	0.53	0.47	0.6	0.79	0.53	0.63	25.24	25.1	23.86	25.02	24.14	25.52	24.14	23.44	0.5359	0.3419	0.5008	0.3297	0.2169	0.4609	0.1644	0.3112	1.1575	1.5321	1.0537	0.9418	1.5707	2.7898	1.7368	0.7733	1.5133	2.1811	1.7849	1.4819	2.7697	1.6346	1.9708
20B	M	22	1	1	1	2	3	4	5	5	0.67	0.69	0.69	0.64	0.72	0.66	0.67	0.65	22.14	20.8	21.46	22.34	22.38	21.86	20.86	21.06	0.6162	1.0105	0.623	0.5235	0.7743	0.4457	0.6653	0.2921	0.5633	0.4812	2.2239	0.5464	1.6573	0.9644	2.4708	1.6765	2.7155	5.0896	3.2631	2.9795	1.7629	2.4452	1.6298
[truncated: 9 more columns]

## Sheet: EEG
δ
t1	1	2	3	4	5	6	7	8	9	10	11	12	13	14	15	16	17	18	19	21	22	23	24	25	26	27	28				t2	1	2	3	4	5	6	7	8	9	10	11	12	13	14	15	16	17	18
13B	26.2547	36.552	60.9768	12.3369	43.7042	21.6483	25.7276	25.9645	45.5061	40.4106	79.1758	30.1944	46.8738	42.5373	41.0332	39.2022		68.1399	28.7684	20.5704	19.6452	61.9702	32.3804	38.7562	25.9904	76.9287	28.0863				13B	27.0207	29.3135	10.7465	2.52096	14.6366	10.8157	19.9478	18.2349	37.2435	35.7572	76.5867	17.5365	28.538	15.9007	27.6381	35.1539	13.5211	12.2242
14A	16.1569	37.6304	14.2877	28.7233	12.0496	13.3193	22.3693	30.8523	54.4661	52.0607	19.2655	27.5059	29.1103	61.0667	60.3229	30.7067	15.6387	11.6258	17.8177	38.2964	24.4566	13.9483	19.7212	31.9683	23.0027	71.224	83.7602				14A	5.63359	9.85071	23.6756	3.22195	5.11622	4.09601	10.4382	10.0439	128.777	14.7021	20.5725	6.96069	23.4429	20.6355	11.4203	15.251	1.1671	6.23429
14B	24.8729	64.9132	8.64261	12.7444	6.27209	10.1463	16.4682	17.399	38.2157	23.3356	25.3768	11.4733	13.3074	13.6095	19.8996	21.0859	5.50865	19.523	14.2015	9.78605	10.5112	21.3275	17.4173	16.3984	11.3796	17.683	23.0012				14B	48.8293	37.5695	16.4042	11.43	14.8209	19.6444	42.3002	48.8386	66.6558	54.8294	46.46	40.5746	41.1309	49.3945	59.6693	85.0843	6.50402	6.92875
15A	63.8916	103.122	32.1619	12.2438	18.3438	17.6096	17.8895	23.1013	37.6681	39.6263	54.4708	54.9701	25.0338	74.5939	30.407	44.423	8.95349	1.89828	20.7373	11.3958	14.9784	22.8774	42.2678	20.6681	19.5722	36.2411	30.5728				15A	32.383	26.6328	3.93464	4.44971	90.685	8.35589	17.8238	25.7369	18.8233	19.6934	41.1098	7.6339	16.4621	12.122	25.2828	19.6215	1.93205	3.31624
15B	66.6737	161.193	47.7663	17.3764	39.1189	5.12763	17.4302	16.7872	30.5145	28.4306		62.6093	24.0255	47.5331	35.0411	20.1765	5.20716	5.25514	15.1407	8.2882	8.3149	23.755	18.5414	18.6937	14.2566	25.5083	54.185				15B	22.9838	33.9396	47.2494	33.8696	7.42727	15.0386	36.7674	67.9382	19.9623	21.2092	40.7695	23.6856	20.9712	29.2931	40.7345	31.8009	15.2784	17.3083
16A	49.3208	21.3344	18.0186	33.339	0.747909	9.70945	7.34097	11.7808	11.3066	16.2686	16.7195	22.9678	3.33853	21.1545	8.05503	14.4454	7.65646	9.19988	9.61539	7.74235	9.37318	4.85328	16.9909	4.20882	12.8045	11.6022	82.65				16A	50.6616	94.993	8.83209	12.2449	3.99827	14.5319	24.0761	20.0548	15.8028	19.7748	11.8257	23.9445	9.18769	18.8918	31.2896	50.7058	2.05987
16B	29.1256	33.7074	9.65157	33.8997	31.0226	21.2836	15.3001	9.83583	15.9717	15.7849	30.2269	16.562	13.3483	13.0594	16.1117	18.7671	6.16196	4.18416	19.2096	4.90661	9.16546	11.1957	14.1457	9.96019	9.92663	26.779	17.2327				16B	32.3175	40.8076	11.1159	6.67503	61.4246	4.53854	13.0339	10.2485	14.376	17.7632	24.1564	22.405	11.0958	11.7103	21.0964	20.9842	6.10831	4.09675
17A	15.0014	16.6343	7.75418	6.07704	2.97962	3.0672	8.23062	10.3859	15.3787	15.5277	15.1036	20.02	11.6545	12.0796	14.1083	14.5573	2.40109	0.259763	7.14691	3.00338	4.346	6.30571	8.83527	7.35152	8.70038	16.6696	18.3302				17A	40.3463	40.6558	6.35164	10.966	4.58646	6.92868	14.8468	18.4127	17.9696	17.4779	45.9916	25.1749	68.0459	19.9143	28.4526	27.4897	4.62753	3.38582
17B	75.8492	23.5768	10.4251	0.943561	13.8152	15.3698	20.5106	8.48444	24.0064	23.8741	10.8386	10.0842	11.2285	12.1404	15.6614	26.1412	0.67661	5.86161	12.6828	18.7388	6.93987	8.44646	0.810549	11.8207	25.4965	10.72	13.1156				17B	16.5618	23.6146	26.8373	18.9602	19.0451	10.1743	16.7481	16.7448	24.3941	19.5887	139.963	16.1955	20.0649	18.0887	27.7177	29.3798	25.7486	6.63402
18A	37.3946	13.9082	1.434	3.41503	3.50968	7.60182	13.226	11.4373	19.9864	17.0471	7.13004	16.9761	12.6871	18.5222	16.1657	14.0756	1.8804		11.7846	15.0822	31.0825		10.3827	14.1108	11.1802		20.4876				18A	22.6603	45.479	13.5472	0.101927	6.46426	15.6696	22.5498	12.0646	29.3246	16.4079	13.9074	17.8174	22.2677	17.5102	51.0716	13.9593	1.90585	5.40466
18B	125.458	121.254	18.8423	30.238	58.8841		23.77	20.5575	41.8983		21.9896		37.0589	38.1622	37.1341	27.5134	5.79496	44.2545		15.335	13.4514	28.2884	26.6914	19.1452	19.8824	45.9904	185.606				18B	38.2759	60.9086	103.15	21.278	76.6017	19.3485	34.4138	30.9782	39.0461	26.4171	70.7743		38.3813	32.6621	67.9264	102.894	6.07089	22.5344
19A	70.1293	14.0511	10.3553	51.9016	9.57721	8.51747	27.7023	13.6431	68.5506	32.9374	65.5815	14.0712	15.3114	12.2917	22.8307	49.4545	12.6119	5.92967	13.9114	23.2392	15.524	34.9649	12.9659	38.7561	11.9662	71.0726	14.1731				19A	57.6485	56.0513	88.4529	54.2264	31.7524	24.9576	64.8853		69.6143	34.46	64.3253		41.0087	68.2316	70.3024	125.251	11.9963	27.9646
19B	22.7331	17.445	12.1942	25.2336	5.49924	12.1246	18.6533	20.829	16.0377	17.6337	17.9114	22.2885	16.1701	11.0392	16.0632	43.2198	1.6988		5.83061	9.66866	21.3076	9.42438	7.85653	13.3855	13.3724	16.596	13.1503				19B	25.099	48.6641	11.8045	5.58858	13.4337	29.8594	27.347	22.1981	28.4788	25.5266	61.3314		24.0468	23.9639	44.1549	61.7409	2.75744	12.9345
20A	54.1203	47.7423	25.6575	8.87397	12.0652	8.23316	28.3082	33.1132	46.6169	46.5389	39.4599		10.0519	27.3753	50.2161	41.2666	4.0071	5.24034	23.0162	13.8873	13.7937	24.6912	18.4089	26.0894	23.1902	144.162	57.5877				20A	81.8124	114.596	57.4335	26.4566	64.3668	35.7645	62.8778	61.6842	59.6382	60.8102	86.4517	50.418	69.4322		79.0887	76.098		45.4263
20B	20.5137	21.3943	6.07062	6.35739	5.13625	4.69775	7.47569	6.46284	10.1709	11.4016	14.6687	10.9513	11.3594	7.72042	10.235	11.7086	2.2479	1.43053	6.99158	3.98704	2.3541	3.39384	3.68644	5.03748	5.57196	5.7517	5.87286				20B	22.201	21.5831	3.90132	6.09568	4.91428	3.595	9.74075	9.00696	14.8383	13.5895	25.6923	8.54504	12.0374	11.9755	13.2075	12.2295	1.48277	6.22985
ζ
t1	1	2	3	4	5	6	7	8	9	10	11	12	13	14	15	16	17	18	19	21	22	23	24	25	26	27	28				t2	1	2	3	4	5	6	7	8	9	10	11	12	13	14	15	16	17	18
13B	6.61073	5.29202	5.03537	2.04141	5.40902	4.56015	8.55181	7.94339	15.6112	14.6474	9.22797	6.1399	10.9901	7.81583	11.6492	11.4218	2.65259	22.7674	7.00112	5.41357	4.96933	5.78711	5.27236	8.35213	6.64274	10.4762	12.763				13B	5.48328	4.37566	2.61254	0.58743	4.01626	2.95889	6.14967	5.38385	14.3801	11.6175	7.77277	5.27535	8.02325	5.22337	8.98339	8.83115	2.28491	2.03645
14A	2.62255	3.49461	2.15357	1.89293	2.84541	2.86086	5.32148	5.80987	9.24253	8.95977	3.78498	3.98485	6.08833	6.90381	9.03506	7.83661	0.66927	1.68854	5.40983	7.08395	3.20096	2.86436	4.33926	6.52986	5.63448	11.1163	13.1181				14A	4.27964	4.19301	2.64096	2.1228	3.14831	3.8599	7.07008	8.02482	8.60354	16.2522	6.61719	6.05221	9.38819	11.0354	10.231	10.9357	0.563305	1.61603
14B	6.54201	36.5038	2.52123	1.04949	3.24694	2.29058	6.352	7.17242	10.9195	9.65895	5.68573	3.69223	5.91563	5.25007	8.88651	8.42919	0.860764	2.04099	6.36643	3.94643	3.80144	4.32791	2.44258	5.60631	4.81977	7.75866	7.25703				14B	11.9464	8.99703	4.30668	4.1592	5.13208	5.0526	11.9032	15.3273	20.7021	23.7766	13.6952	10.9878	13.9942	13.4116	17.8822	21.8548	1.26431	1.69387
15A	4.63573	6.18413	1.95677	1.61493	2.60067	2.07061	5.2793	5.07925	8.38234	8.31178	5.47713	4.8564	4.40644	9.10562	6.34265	6.70112	0.803842	0.309623	4.00451	1.63693	2.28137	2.69881	3.06786	4.02973	4.05087	4.82674	5.27541				15A	4.24278	4.01912	0.705077	0.943126	4.93133	2.31108	6.46324	5.94063	7.18602	5.34064	3.97055	1.74596	5.5069	4.10787	8.52435	6.94215	0.309314	0.579218
15B	6.03859	4.73729	4.03487	3.44585	6.93355	2.85363	6.78337	6.53326	11.3037	10.5258	12.4623	6.70185	7.04113	7.95025	10.1549	9.20657	0.955337	5.25514	6.34228	3.88813	3.90288	4.67889	4.44132	6.90176	5.48679	8.34992	10.0683				15B	8.60736	9.18971	4.08931	4.88067	3.00234	6.83021	11.0113	19.1087	11.5813	19.1214	9.22694	10.7058	9.76001	12.1354	13.3371	18.0336	2.92876	3.21759
16A	4.75382	5.20252	2.39038	6.80383	0.259754	3.78963	1.9306	5.68467	5.53953	8.2515	2.73968	5.34889	1.55474	7.31519	3.2992	8.07641	2.46487	2.28236	3.97872	1.87733	3.34297	1.36233	5.43704	1.83511	4.52488	2.45562	13.9566				16A	7.87843	8.38112	2.73812	4.86734	1.66765	5.73699	4.5802	9.66106	8.14672	17.7122	4.33512	7.79069	4.84042	8.9872	6.50961	13.6813	0.675907
16B	6.59246	6.83527	2.61402	2.31399	3.31359	2.42517	9.03797	6.55977	11.1561	10.9006	7.17471	4.84447	7.92821	5.95997	11.1632	10.5584	0.770899	1.02567	6.43588	3.1547	3.0235	4.57478	3.79765	6.35525	5.75193	9.40308	8.28619				16B	9.80768	8.23315	4.33986	2.24813	4.62126	2.88068	8.84889	8.49068	12.0433	12.952	8.98851	7.77124	9.5266	8.77208	12.6869	11.2559	1.25202	1.08932
17A	6.24568	6.46985	2.94292	3.4399	1.99247	2.15391	4.58512	5.8271	10.4435	10.0944	8.03606	7.262	8.14186	7.5003	11.2212	9.99725	1.43569	0.144966	3.8365	1.62158	2.27343	4.36297	4.7684	5.28112	5.66537	9.35575	8.81675				17A	6.66637	6.87569	2.79682	4.036	2.60713	3.72388	7.67254	8.82919	11.6639	14.7814	9.12399	8.39025	10.6431	9.90765	14.2263	13.6157	1.16185	1.17759
17B	9.21203	12.8389	3.58829	0.332365	3.85116	3.37795	5.3225	3.00986	9.35324	8.36245	5.17475	3.16836	5.60358	3.79277	7.80468	7.57505	0.186254	1.93475	4.27837	4.97483	2.40488	4.06752	0.30413	6.28884	5.35718	5.16287	3.79449				17B	12.4416	6.46003	4.53739	3.64489	3.67758	3.4819	5.74051	5.74175	8.91091	6.65055	4.93489	5.69398	7.215	6.70982	10.4013	8.85864	2.15158	1.51099
18A	3.11692	3.42527	0.62461	1.39853	1.61102	3.05302	4.78871	5.34036	9.3759	7.76795	2.64855	5.20999	4.546	6.96291	6.78275	7.03346	0.280289		4.40954	2.37233	3.51055		4.19377	4.25878	5.18462	18.0746	8.37091				18A	6.02134	5.84115	2.20346	0.00397762	3.07399	4.20386	6.82639	7.03907	28.1021	11.6057	3.84353	6.37002	7.65718	8.75091	10.3542	9.26005	0.466132	0.817166
18B	12.7767	15.7514	4.76219	7.59058	8.10494	6.57989	12.8292	12.1939	19.3611		7.14449		14.4834	14.0951	20.4691	18.6759	1.57025	3.75263		8.77849	7.72059	8.82892	9.45176	10.7199		15.5425	18.3718				18B	17.4433	16.7022		9.03519		12.0008	22.7003	23.3045	23.036	29.7355	19.3709			24.3744	34.5041	36.1479	1.15655	7.51077
19A	9.87052	6.70974	4.11012	3.97235	4.14566	4.58684	7.75184	6.9234	13.4535	12.7115	12.6829	6.37354	10.0238	6.51165	15.7245	9.59922	3.21588	1.53902	10.2573	5.45682	6.36622	7.05122	6.09047	10.3873	6.70988	12.6108	7.11251				19A	9.233	17.1071	3.57871	5.52473	5.63961	8.60111	11.0127	16.6648	13.2023	13.2124	9.84756	8.72364	8.75019	7.73329	12.424	17.7772	1.64646	2.39213
19B	4.47943	3.48607	2.44632	3.06296	2.52175	3.06395	4.95843	6.34874	7.32019	8.10687	5.32289	3.43937	5.51325	5.85988	6.86117	10.7781	0.318092		1.782	3.19431	4.24249	3.85096	3.8788	4.83127	5.47281	6.15652	6.44952				19B	6.06425	5.61602	3.7759	1.7277	5.38933	4.15734	10.5057	8.51556	17.364	24.7491	8.82345		3.52993	9.6983	19.4496	26.3281	0.709886	2.47299
20A	13.9953	14.0452		5.00348	9.73892	7.4087					14.8023		6.56405				2.27652	3.58781	13.6041	9.64173	6.30595	14.6996	13.1228			21.5064	23.2828				20A	11.3902	12.1069	6.10409	5.15653	7.86335	6.07987	14.8332	9.52433	19.8388	20.4607	12.8494	11.3209	12.8655	16.6883	19.3009	14.7497		7.04384
20B	4.28454	4.07171	1.88101	1.58968	1.62806	2.02568	3.60432	3.57026	5.6876	5.80457	4.21448	4.11961	5.24736	4.16643	5.41728	5.3152	0.825184	0.692315	3.2978	1.17392	0.653858	1.92077	2.08446	2.52614	2.68779	3.42752	3.4204				20B	5.82796	6.01877	2.14852	2.01332	2.5063	2.21866	5.8766	5.60087	7.14505	9.77635	7.63231	5.11207	7.77464	7.31289	8.37983	7.92329	0.662907	1.25338
α
t1	1	2	3	4	5	6	7	8	9	10	11	12	13	14	15	16	17	18	19	21	22	23	24	25	26	27	28				t2	1	2	3	4	5	6	7	8	9	10	11	12	13	14	15	16	17	18
13B	3.90155	2.76407	2.17801	0.922248	5.10709	4.90341	6.25191	5.54868	7.77065	8.12647	4.48364	2.98724	5.74442	4.74487	6.9863	6.38554	1.4467	8.48576	4.66803	4.52062	4.05831	4.62206	3.38455	6.72971	5.22632	5.60104	4.86783				13B	2.00253	1.47155	1.35729	0.201918	3.20962	2.04933	4.06986	3.58406	6.62415	4.37378	2.69486	1.60321	3.77969	2.40972	4.02444	3.46508	0.711973	0.729392
14A	2.17274	2.88745	1.59225	1.4554	13.584	9.96459	41.0066	41.2919	27.8025	26.1163	4.82136	5.30716	14.2023	15.5173	24.6976	41.6048	0.457842	6.45325	52.4582	49.02	16.8806	5.93758	7.17252	28.7426	26.3642	11.9057	12.6456				14A	3.11049	3.082	1.69981	1.63835	5.35198	7.14971	18.8671	20.2017	25.3408	17.3175	5.33761	6.6688	15.5446	21.6516	16.9413	19.3742	0.434595	3.7625
14B	13.5475	13.4848	6.82857	2.93441	21.1081	21.6659	93.1287		145.731	154.782	22.0716	15.6781		41.4805	150.131	139.265	2.15882	10.5826	78.2489	44.1095		26.0111	15.8256	62.1238	59.0825	36.5895	34.3043				14B	6.45366	5.17218	3.34271	2.63762	4.83481	5.88548	14.045	23.5153	79.8311	19.6311	8.55364	7.24823	10.7515	10.9211	17.0468	22.4707	0.920983	2.06531
15A	2.92165	3.27773	1.47605	1.45727	1.92708	2.44733	14.0354	19.5066	45.8436	51.6001	5.00271	4.61645	7.65577	10.3986	24.1358	28.4169	0.532576	0.221338	13.2796	2.50969	3.70847	2.89333	3.26229	7.26166	9.27217	9.16438	9.93275				15A	1.55842	1.36127	0.269512	0.359261	3.36158	1.00592	3.26122	2.69443	21.737	19.7679	1.72216	0.701776	2.61489	1.86695	4.28245	3.67176	0.114385	0.209435
15B	5.33092	4.40514	2.37499	2.72906	10.4913	9.61144	19.2629	32.7249	51.1309	63.3959	8.66873	7.20476	11.2219	15.0055	29.9363	60.8142	0.736391	2.84535	17.7245	9.09673	10.9141	5.76831	6.21252	16.2955	19.1692	10.2182	12.5745				15B	3.47422	4.10819	1.1342	2.06658	1.89804	5.19113	6.80566	10.9731	34.1049	11.377	3.77826	4.77309	4.73266	6.41478	7.87479	13.6816	0.971357	1.40257
16A	5.35164	12.3553	2.27299	6.40122	0.556776	11.9652	11.8666	46.8794	41.0106	71.5529	3.19186	4.18548	3.36212	12.0951	33.5864	65.1034	2.60186	4.06977	25.4472	8.77027	16.2499	2.00903	7.49491	9.80999	15.3445	3.64631	10.8163				16A	2.86452	3.44687	1.16073	2.28671	0.882645	3.91972	2.30396	38.8657	11.1732	14.3509	1.53122	3.35088	1.88316	4.34952	3.75778	7.42511	0.273796	3.96315
16B	8.63887	8.24295	3.98184	4.21712	13.0952	10.8605	50.4512	50.5205	66.3836	67.0592	11.833	10.454	22.9277	27.2281	66.4748	82.0546	1.21549	4.86549	47.3571	24.1604	20.1354	9.8936	10.2696	31.497	30.8483	19.1583	25.1949				16B	4.68906	4.37902	2.57204	1.37729	4.52655	3.54331	16.1541	19.4503	34.0753	20.5857	5.37842	5.03405	10.1737	11.1129	22.6349	20.446	0.678245	1.34471
17A	11.35	11.298	5.40298	4.93286	3.80955	4.12026	25.482	45.8482	59.8384	57.7978	13.7463	11.9296	12.7225	14.1689	44.5779	44.3138	3.04731	0.356271	28.4611	8.1906	14.2904	6.90459	7.49767	12.8248	16.9528	15.7178	15.7415				17A	3.76841	3.64205	1.51612	1.83261	2.61389	3.36746	7.36572	8.0619	30.8253	16.8263	5.01766	4.30297	6.6105	5.85875	13.7839	11.1356	0.621994	0.949147
17B	3.77816	2.98399	3.07371	0.221098	5.81095	9.3064	19.2784	21.4739	58.722	63.6494	4.44845	2.56176	5.80802	4.0492	21.5532	51.3574	0.113551	2.98067	20.1265	17.0073	13.2924	3.8107	0.228882	14.7467	16.5558	5.00004	3.51019				17B	4.12823	3.32308	1.71464	1.76819	5.62116	4.71892	12.7569	17.152	27.9575	20.6141	6.11435	3.11075	6.3637	7.86424	17.2217	24.2581	0.74612	1.36395
18A	2.23845	2.71559	0.600158	0.967731	4.5725	6.85361	49.1934	37.6053	116.663	80.8874	2.10225	3.41567	8.72064	8.92551	62.1132	41.338	0.374258		36.8534	16.2826	16.4569	37.6516	5.13302	20.6372	13.8113	4.89745	6.42859				18A	2.64923	2.59778	1.11759	0.00226067	3.631	3.65559	14.5903	12.3397	10.4123	32.0448	1.96809	2.85835	7.37746	6.24432	14.6407	14.1099	0.214694	0.636507
18B	13.6349	12.6195	4.61006	4.613	26.5437	12.6933	102.416	88.0025		122.515	13.3259	15.4483		36.5083	170.78	126.033	1.25435	5.92103	87.0674	47.9049	31.5418	21.815	10.3161	67.8794	43.5198	32.835	30.5385				18B			5.62487	4.05806		7.8813	28.0478	41.7159	29.7949	30.1662	15.6956	12.8395		22.3197			0.621326	4.14538
19A	10.6859	9.24067	3.48121	5.25493	4.34884	7.44299	30.0854	30.5586	57.0951	82.1029	14.9005	9.55663	11.6952	28.8875	50.5218	86.244	1.7709	1.45407	21.9307	9.15041	10.5143	10.1669	10.7887	27.1692	27.2006	15.4754	11.8484				19A	6.88202	7.50876	3.67139	4.58572	3.78239	5.10762	18.5378	28.3097	54.7006	43.2799	7.78669	7.01677	7.56682	18.8996	26.0376	33.1403	1.03942	1.06398
19B	2.45897	1.98094	1.38617	1.75838	4.34836	7.25366	9.14148	13.1343	17.3898	17.8147	3.14266	1.87156	4.99794	8.25439	13.1494	20.4683	0.162809		3.28309	4.80114	5.35256	2.86183	4.46737	6.55376	11.0886	4.29105	5.34262				19B	1.88927	1.42656	1.11771	0.4227	2.07176	1.9424	5.27363	4.31444	14.4835	9.60411	2.52283		1.23108	3.78178	9.53923	12.0528	0.210293	1.03214
20A	10.6675	10.3079	9.35044	3.49639		18.3211	63.5573	35.1791	73.4595	48.9166	16.8591		10.3111	23.1345	69.7818	46.2921	1.42155	5.77103	32.0391	34.0508	15.3004	29.3702	12.3059	61.7652	25.7685	28.4487	19.7001				20A	4.62251	4.40479	2.95344	1.85724	6.03234	4.73502	28.8709	9.05349	49.2335	20.2826	7.6753	4.86664	12.4246	9.17114	26.5306	11.9379		3.63009
20B	4.07697	3.64329	2.07178	1.82951	5.70925	6.47441	18.6223	23.8239	49.3228	49.8145	4.97888	5.37437	13.2114	12.5171	30.6752	44.7475	0.717096	1.68667	15.2211	1.31713	0.799098	6.90336	9.05882	5.20435	6.26121	16.6703	15.446				20B	3.53973	3.90934	1.46346	1.35646	3.18928	2.81067	8.47028	7.0353	31.146	15.1453	5.12503	3.50417	7.80258	7.66203	13.2219	11.0987	0.401503	0.867442
low β
t1	1	2	3	4	5	6	7	8	9	10	11	12	13	14	15	16	17	18	19	21	22	23	24	25	26	27	28				t2	1	2	3	4	5	6	7	8	9	10	11	12	13	14	15	16	17	18
13B	4.20758	2.95478	3.26021	1.30643	6.37842	5.54944	7.25241	6.42441	9.12235	10.7703	5.87082	3.85649	7.4552	5.8202	8.48489	8.05966	1.3697	6.56631	5.54805	4.96864	4.45706	6.21797	4.32426	7.9782	5.96262	6.77173	5.6766				13B	2.43292	1.74073	2.444	0.286415	4.1212	2.46116	4.71946	3.72235	7.9931	4.72301	3.76069	2.10781	4.72478	3.10121	5.01012	4.00803	0.775047	0.88185
14A	1.09191	1.74576	1.48518	1.08756	2.17311	1.7727	6.31649	7.04102	7.59951	7.0067	1.87776	1.77615	3.37585	3.47947	5.92095	8.08021	0.286168	1.09617	7.02757	5.70607	2.45404	1.59354	1.87199	4.6444	4.56132	4.66656	4.36303				14A	1.41672	1.35704	1.03998	0.749999	1.19406	1.33168	3.29949	4.04331	6.52444	15.2154	1.90789	1.75548	2.8959	3.78022	3.57558	4.00359	0.193586	0.710878
14B	7.84971	7.6018		1.79747	8.52165	5.27456	16.506	17.2785	21.6117	21.7493	12.7384	6.43684	12.3491	12.2058	20.7232	18.8715	1.42759	3.70185	15.7983	9.87768	9.22086	10.0431	5.11363	14.1905	10.5885	13.9031	11.7292				14B	8.14786	8.11615	4.93449	4.63021	6.53724	6.45867	12.2129	13.6505	16.0737	16.1407	9.87319	10.4996	13.2897	13.0291	15.7357	16.8036	1.18346	2.1635
15A	1.33506	1.50808	0.707176	0.808051	0.918063	1.05513	3.24198	3.46429	7.50038	7.32801	1.9177	2.02686	2.61337	3.06115	5.17878	4.62138	0.255216	0.128096	2.62515	0.826645	1.1255	1.21828	1.49466	2.2453	2.39727	2.91909	3.33332				15A	1.6487	1.62514	0.281909	0.370425	2.45758	0.909519	3.01457	1.85058	4.13885	11.5508	1.96308	0.794048	3.34312	1.72285	3.81599	2.16033	0.115632	0.207988
15B	2.99354	2.38392	1.42314	1.67758	2.7916	2.58382	4.83948	5.68277	9.376	8.77493	4.72559	3.46299	4.13334	4.10239	7.32689	8.0578	0.324276	2.29839	4.07759	2.13268	2.38414	2.3784	2.46312	4.11566	4.22294	4.41302	4.94346				15B	2.43729	2.77096	0.866879	1.71998	0.948665	2.4643	3.12216	5.03066	6.42761	4.74426	2.35366	3.26344	2.59975	3.39523	3.94864	4.45626	0.641863	0.772637
16A	2.7168	4.27114	1.3506	3.41367	0.207661	5.21341	1.91426	8.15406	5.61605	9.73269	1.6725	3.50854	1.348	5.98133	4.0509	10.1417	1.70304	1.38308	4.03918	1.63709	3.33206	0.950376	4.72009	1.82604	6.0633	1.72275	6.04155				16A	3.33271	3.6709	1.72644	2.29251	0.632959	3.00505	1.49757	4.98501	4.48734	6.90763	1.52598	3.49052	1.59243	3.88877	2.28247	5.25454	0.24129	3.21973
16B	4.90231	4.80362	2.55962	2.02059	4.41522	3.03515	13.4386	11.6968	21.4448	20.4875	5.77737	4.43116	9.09962	8.24166	21.4638	21.2992	0.60037	1.12823	10.0642	5.07063	4.14005	4.85923	3.85532	10.5109	8.90337	7.9392	8.8246				16B	4.87336	4.91873	2.8644	2.0743	3.04224	2.34449	8.31795	8.10515	20.283	15.6995	5.20071	5.31178	6.69249	7.05564	11.0773	9.66887	0.798879	0.759713
17A	3.28882	3.24696	1.82719	1.96177	2.44467	2.69739	5.1378	6.05693	7.95227	7.96619	3.86671	3.75627	4.29066	6.33324	7.00831	7.13139	0.829381	0.140314	4.36789	1.8376	2.55789	2.94861	3.18666	4.64778	4.58639	4.36842	4.58035				17A	2.78212	2.81632	1.76692	2.10882	2.13053	3.41051	4.26843	5.2526	6.91543	7.37962	4.26739	3.67383	6.20423	4.9112	5.97004	6.43724	0.604437	0.794219
17B	3.67967	3.05293	2.74634	0.231461	3.95828	2.51009	5.3713	3.54015	8.90943	8.44964	3.62272	2.37104	4.11763	2.80595	6.40902	6.66947	0.131828	1.58426	4.19619	4.99754	2.67367	3.41599	0.231915	5.50635	3.73279	3.71109	2.70739				17B	4.84311	5.48966	1.29708	2.24639	2.53044	2.58394	3.87772	3.94592	7.20521	4.53295	4.1725	3.0364	3.95539	4.25385	5.87271	6.04922	0.553414	0.888382
18A	2.38444	3.56986	0.792031	1.73381	2.61371	4.35256	9.09448	10.0683	17.1425	13.406	3.14963	5.38071	6.60191	8.23309	13.3203	12.4536	0.291439		7.27025	3.5725	4.74068		8.79193	7.12517	7.44207	5.29473	8.18333				18A	6.16504	6.65928	4.32288	0.00770831	8.24958	5.72879	9.23229	8.79269	23.8569	13.1738	9.14151	9.33144	9.51591	11.2893	10.6925	11.3058	0.46057	0.793248
18B	5.55153	5.88845	2.25632	2.93981	4.99965	3.89862	13.3274	13.0795	19.1653	19.8974	4.0418	7.09264	10.573	10.1564	20.4221	17.1822	0.586435	1.28479	11.1045	6.30286	5.49421	5.53893	4.34657	10.7081	9.78072	9.30273	8.68788				18B	5.02105	4.78536	3.02083	2.59183	6.27532	4.66228	10.1182	10.4577	14.1023	10.5013	5.33954	5.53824	9.76137	9.36075	14.6332	18.5033	0.334681	2.26192
19A	3.85309	2.62105	2.8857	3.23698	3.34111	3.31029	7.22237	9.21214	22.9379	20.7437	8.10415	2.61393	4.99008	9.57714	12.0808	13.4951	1.16371	0.866526	7.94364	3.48087	4.39535	6.23674	2.52722	7.14077	7.81868	8.37337	3.02338				19A	3.56066	3.40772	2.21638	3.01349	2.78868	2.97168	9.08229	9.1054	22.7208	16.8709	4.1355	5.23765	4.3622	5.23098	13.5063	11.134	1.15345	0.591335
19B	2.41459	1.95991	1.21949	1.49999	1.34131	1.67686	2.48254	2.82809	3.24089	3.58126	2.32966	1.3326	2.48905	2.6761	3.07443	4.21087	0.138241	7.85981e-12	1.0906	1.67135	1.7347	1.80731	1.79185	2.26493	2.7083	2.56055	2.60848				19B	2.28475	1.96139	1.39563	0.494836	1.67907	0.96106	2.72214	2.03442	4.69492	4.38417	2.47787		0.891957	2.09529	3.97885	3.85664	0.196424	0.70343
20A	10.5791	10.3284		4.32149	12.6473	8.85323			46.5188	37.6763	11.7914		6.42804	19.7448	41.4481		1.77897	4.50887	21.7338	15.3439	10.0042	13.4075	10.5924	22.7914	20.5766	16.8003	15.9446				20A	6.98754	6.79734	5.05352	2.64633	9.29639	5.65427	14.7806	10.8285	16.6099	20.9918	8.43465	6.49475	10.6051	11.4774	21.8162	15.3586
20B	2.36646	2.21189	1.40501	1.19044	1.65234	1.84938	4.37265	4.75084	8.54949	8.30971	2.57465	2.30688	4.55597	3.53885	6.25686	7.67522	0.48815	0.503778	3.52844	0.862616	0.441723	1.80325	2.10598	2.27403	2.09815	4.33948	3.94073				20B	3.87083	4.19376	2.65806	1.38434	2.06638	1.93857	4.71139	4.92056	8.06459	7.7995	4.20161	2.93994	5.72949	5.4377	6.57062	6.73671	0.43793	0.740783
high β
t1	1	2	3	4	5	6	7	8	9	10	11	12	13	14	15	16	17	18	19	21	22	23	24	25	26	27	28				t2	1	2	3	4	5	6	7	8	9	10	11	12	13	14	15	16	17	18
13B	1.17782	0.813136	0.758669	0.352921	1.09989	1.00162	1.44768	1.57458	1.9251	3.28783	1.45948	1.02413	7.4552	1.25941	1.70154	2.11274	0.344904	1.43547	1.24305	1.01363	0.955605	1.13958	1.02726	1.63535	1.27411	1.59597	1.38657				13B	0.691994	0.515581	0.546688	0.0880326	0.80534	0.508504	0.880066	0.806689	1.54583	0.988978	0.9691	0.625285	4.72478	0.727701	0.990982	0.873865	0.214679	0.236716
14A	0.411797	0.516637	0.498916	0.328621	0.43229	0.363901	0.725547	0.764148	0.978437	0.933261	0.636391	0.513826	3.37585	0.680835	0.717344	0.774857	0.0886323	0.263922	0.909848	0.847275	0.419703	0.440488	0.447984	0.696484	0.657705	1.2991	1.02853				14A	0.51812	0.505428	0.365128	0.27412	0.345756	0.354082	0.629434	0.868358	0.907675	4.14791	0.655089	0.517271	2.8959	0.822805	0.706771	0.763528	0.0778387	0.206884
14B	3.51975	2.88072		1.05351	2.24128	1.45035	3.43647	3.44356	5.49812	5.37511		2.54271	13.3769	3.69977	4.54698	3.90609	0.500385	1.03776	3.13382	2.20472	2.03123		2.05061	3.42728	2.69516		3.48563				14B	2.15888	1.58123	1.34196	1.04121	1.22671	1.19359	1.93621	2.19952	4.14034	2.85894	2.71384	2.0807	13.2897	2.15452	2.58316	2.67905	0.25696	0.393888
15A	0.452632	0.511119	0.266301	0.315682	0.302427	0.385908	0.691609	0.67458	1.36312	1.19497	0.622548	0.74702	2.61337	0.833542	1.01627	0.808396	0.0948855	0.0481335	0.565399	0.239138	0.322407	0.403334	0.606684	0.602107	0.697232	0.715747	0.942389				15A	0.683039	0.846806	0.146186	0.173279	0.655179	0.399877	0.870672	0.654808	1.03369	2.43112	0.719564	0.342939	3.34312	0.670116	1.025	0.704361	0.0553167	0.0936584
15B	0.887419	0.831775	0.615851	0.698556	0.785917	0.899351	1.11545	1.1142	1.62032	1.41552	1.83409	1.37505	4.13334	1.36239	1.51533	1.24948	0.117868	0.819513	0.903998	0.586018	0.674328	0.912559	1.00691	1.19395	1.40493	1.71739	1.86409				15B	1.14748	1.19302	0.421685	0.744809	0.513257	1.11425	1.24754	1.55375	1.43563	1.72834	1.16919	1.42642	2.59975	1.43996	1.42962	1.64709	0.264053	0.379052
16A	1.05445	1.23424	0.418418	0.894887	0.0638273	1.3809	0.389685	1.5466	1.03464	1.63351	0.428366	4.81971	1.348	1.25593	0.572186	1.72384	0.430854	0.521661	0.813551	0.396613	0.807211	0.246619	1.3597	0.381709	1.47857	0.389425	1.2195				16A	1.80402	1.49003	0.571151	0.735116	0.241442	1.06224	0.436846	1.7235	1.56442	2.12823	0.474104	1.06924	1.59243	1.15815	0.69676	1.56434	0.0979153	0.506692
16B	1.21164	1.33402	0.602359	0.536869	0.681845	0.534258	1.63371	1.49364	4.35424	3.6214	1.15971	0.986958	9.09962	1.16846	2.51995	2.01174	0.157252	0.224595	1.4141	0.725552	0.655945	0.904588	0.804463	1.45202	1.10622	1.37088	1.37266				16B	1.62804	1.69604	0.818243	0.70427	0.760329	0.661994	2.34254	1.80585	8.28829	6.04007	1.64283	1.8797	6.69249	1.74562	2.72681	1.94196	0.216767	0.237902
17A	1.59842	1.92711	0.773485	1.09428	0.886818	1.13814	1.44086	1.66823	1.88604	1.9477	1.6923	1.73213	4.29066	2.69381	1.94296	1.91163	0.357029	0.0548801	1.05126	0.512054	0.754165	1.19795	1.23184	1.74414	1.79009	1.71915	1.69474				17A	3.64839	4.00131	1.69735	2.60655	1.56104	2.2433	3.10544	3.31418	2.88906	4.54318	3.89851	3.7304	6.20423	3.59249	4.0215	4.17018	0.686458	0.626819
17B	1.40592	1.32918	0.766197	0.085385	1.10415	0.592498	1.13068	0.75919	1.967	2.16663	1.02913	0.800819	4.11763	0.764275	1.50107	1.35313	0.0521321	0.589896	0.944771	1.06868	0.637529	1.01021	0.0869643	1.31778	0.832308	0.996554	0.790181				17B	1.44689	1.73227	0.407623	0.822023	0.787167	0.822396	0.992649	1.06159	1.75911	1.24988	1.44153	1.10065	3.95539	1.23455	1.60481	1.65314	0.21862	0.358486
18A	1.23041	1.96064	0.351356	0.916864	0.744648	1.2847	1.88166	1.9191	3.30202	2.73475	1.26939	2.17325	6.60191	2.16296	2.61383	2.38494	0.146033		1.62825	0.97959	1.1054		1.91231	1.6549	1.73851	1.93889	2.7496				18A	3.57084	2.49995	1.43189	0.00240613	2.06531	1.61722	3.54481	3.34366	6.3564	5.07551	2.91649	2.6554	5.08525	3.14612	3.92703	4.54171	0.231798	0.35139
18B	0.96606	1.06367	0.446679	0.560542	0.645975	0.556331	1.09484	1.10705	1.5154	2.31031	0.602143	3.74756	10.573	1.4255	1.64845	1.34563	0.125188	0.213194	0.86462	0.608785	0.570996	0.973106	0.730294	1.08657	1.2652	1.48073	1.0907				18B	0.909657	0.800952	0.562832	0.448328	0.801248	0.694936	1.13582	1.16569	1.27943	1.34205	0.797603	0.940917	9.76137	1.35762	1.82106	1.81544	0.0716405	0.348774
19A	1.47185	1.0475	0.408994	1.54894	1.49132	1.61149	2.16676	1.50786	4.26304		2.60947	3.46013	4.99008	2.30592	4.32213	2.09291	0.383837	0.344987	1.55869	1.20656	0.950781	0.727972	1.04041	2.05876	2.33633	2.92143	4.8677				19A	1.56025	1.32244	0.86531	0.935753	1.15429	1.3085	2.70735	2.46014	4.91119	5.42855	1.80752	1.54927	4.3622	1.7833	3.81165	2.86958	0.282162	0.186768
19B	1.33295	1.15976	0.610476	0.734773	0.487219	0.447842	0.778765	0.846451	1.02336	1.13406	1.03227	0.418565	2.48905	0.703503	0.913935	1.07062	0.0761536	0.344987	0.437215	0.571178	0.548672	0.692503	0.528646	0.730746	0.691983	1.02702	0.852817				19B	1.39479	0.821056	0.334896	0.13351	0.362018	0.219888	0.630528	0.469965	1.74839	1.25881	0.656424		0.891957	0.426416	0.90962	0.752212	0.0736642	0.169559
20A	3.8034	3.51157	2.82199	2.06155	2.50565	1.80652	4.60207	3.76277	6.02637	5.53631	3.4862		6.42804	4.04108	5.73199	5.24987	0.646465	0.996879		2.69613	1.98522	3.24525	2.51667	4.16441	3.47608	4.05017	3.94892				20A	2.45387	2.34103	1.74526	0.997566	2.4504	1.49274	3.87125	2.41141	5.00575	5.21632	2.72758	2.0168	10.6051	2.78654	4.35755	3.30788	0.572734
20B	1.19582	1.07899	0.634598	0.51565	0.820864	0.585618	1.39099	1.01795	1.62321	1.46894	1.12757	0.825617	4.55597	0.948979	1.78066	1.34606	0.177799	0.15892	0.856211	0.359595	0.184189	0.586159	0.542072	1.07971	0.680001	1.92623	1.04271				20B	2.22765	1.87389	0.940652	0.61001	0.854996	0.630781	1.41847	1.2849	1.82164	2.02924	1.61118	1.03809	5.72949	1.39516	1.86807	1.70895	0.183009	0.342055
[truncated: 37 more columns]
