# Supplementary material for: Cortical excitability signatures for the degree of sleepiness in human
Source: eLife journal article supplement (doi:10.7554/elife.65099), 2021-07-27

**A**

7am  
Sleep deprived 0 and 24 hours

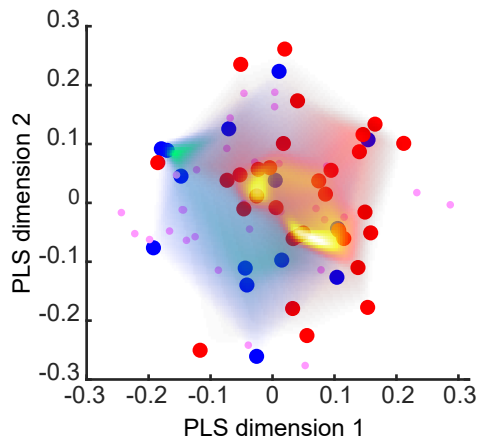

11am  
Sleep deprived 4 and 28 hours

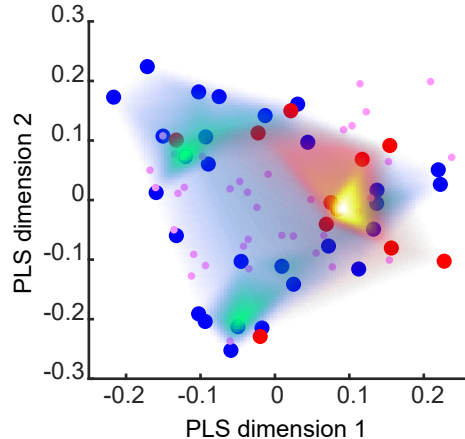

5pm  
Sleep deprived 10 and 34 hours

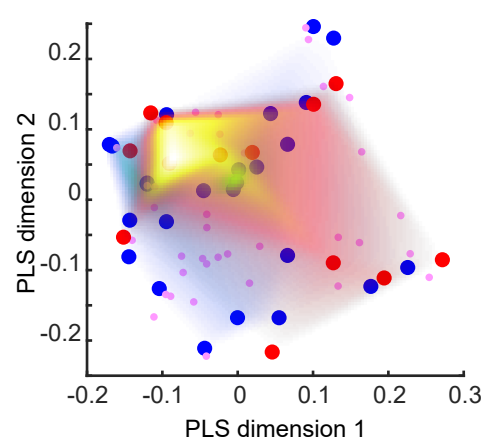

—●— Non-sleepy state    —●— Mild sleepy state    —●— Sleepy state

**B**

SSS = 1 or 2

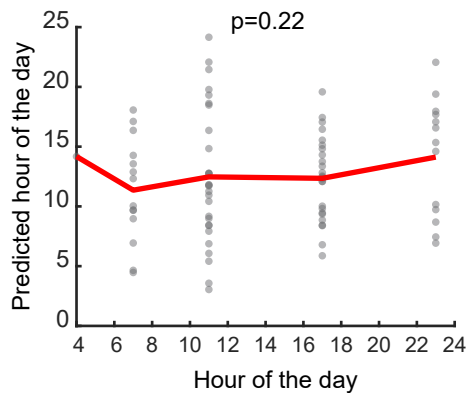

SSS = 3 or 4

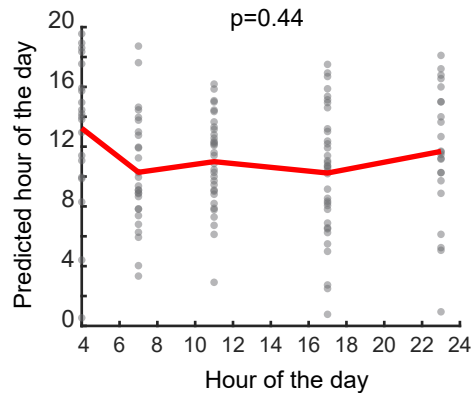

SSS = 5, 6 or 7

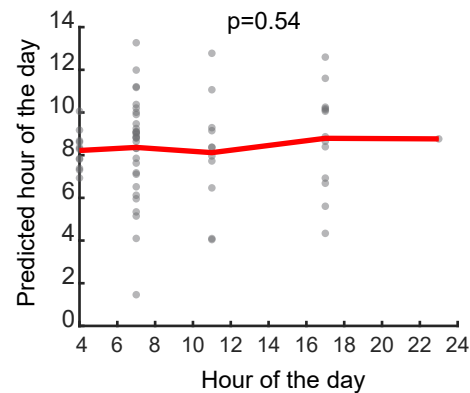

Supplement: supp [file elife-65099-supp-v1.zip]
