# Supplementary figures and images for: Cortical excitability signatures for the degree of sleepiness in human
Source: eLife journal article supplement (doi:10.7554/elife.65099), 2021-07-27

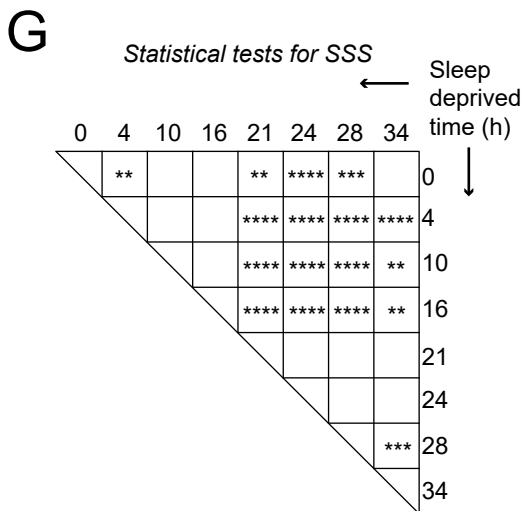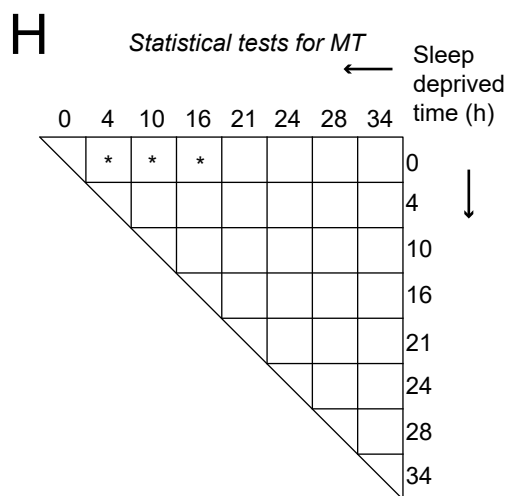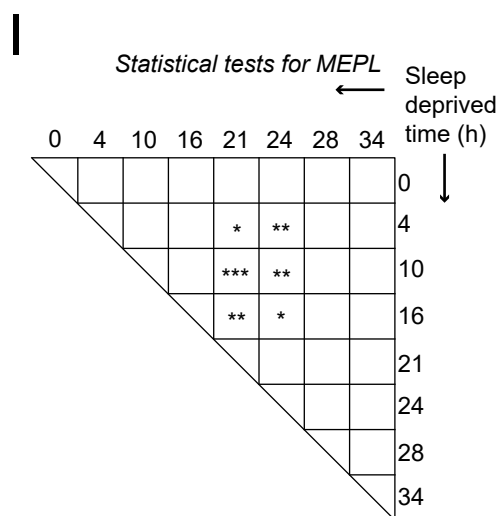

Supplement: supp [file elife-65099-supp-v1.zip]

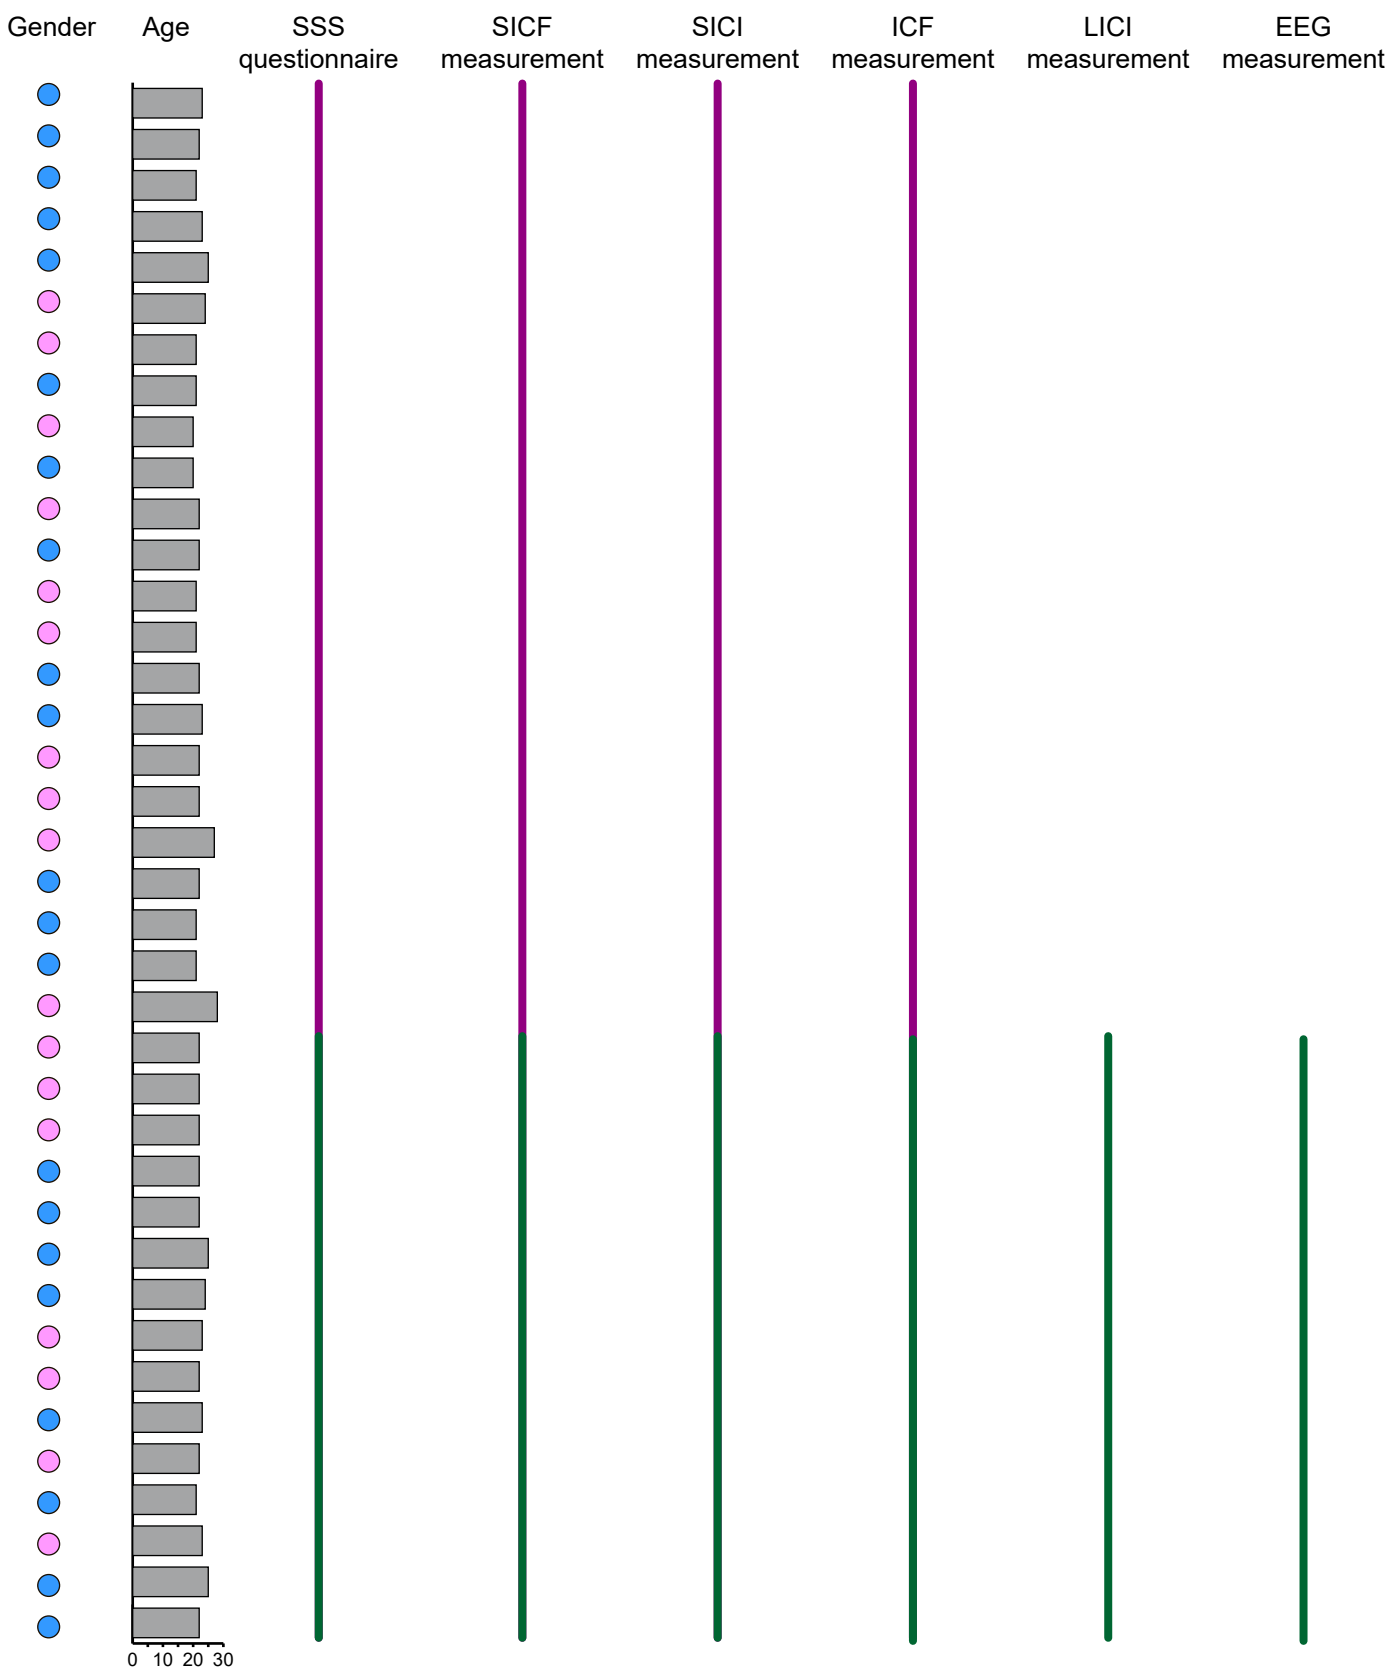

All participants

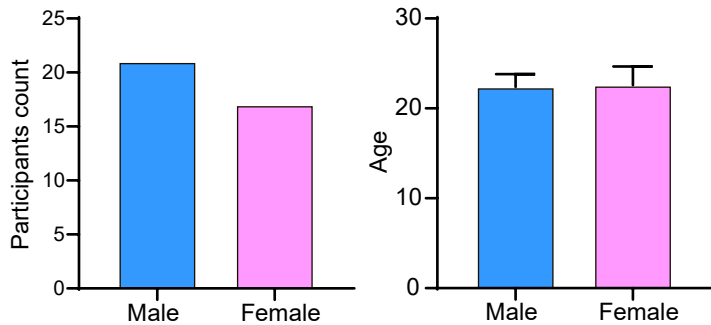

EEG participants

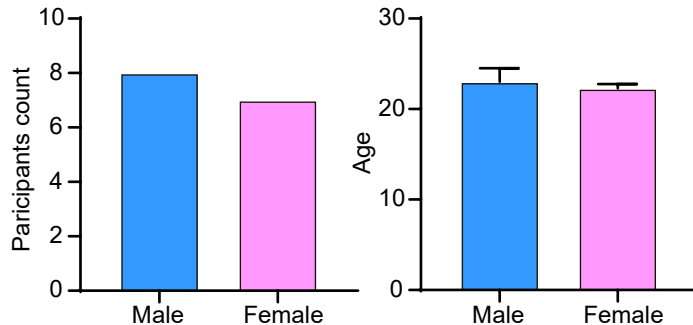

Supplement: supp [file elife-65099-supp-v1.zip]

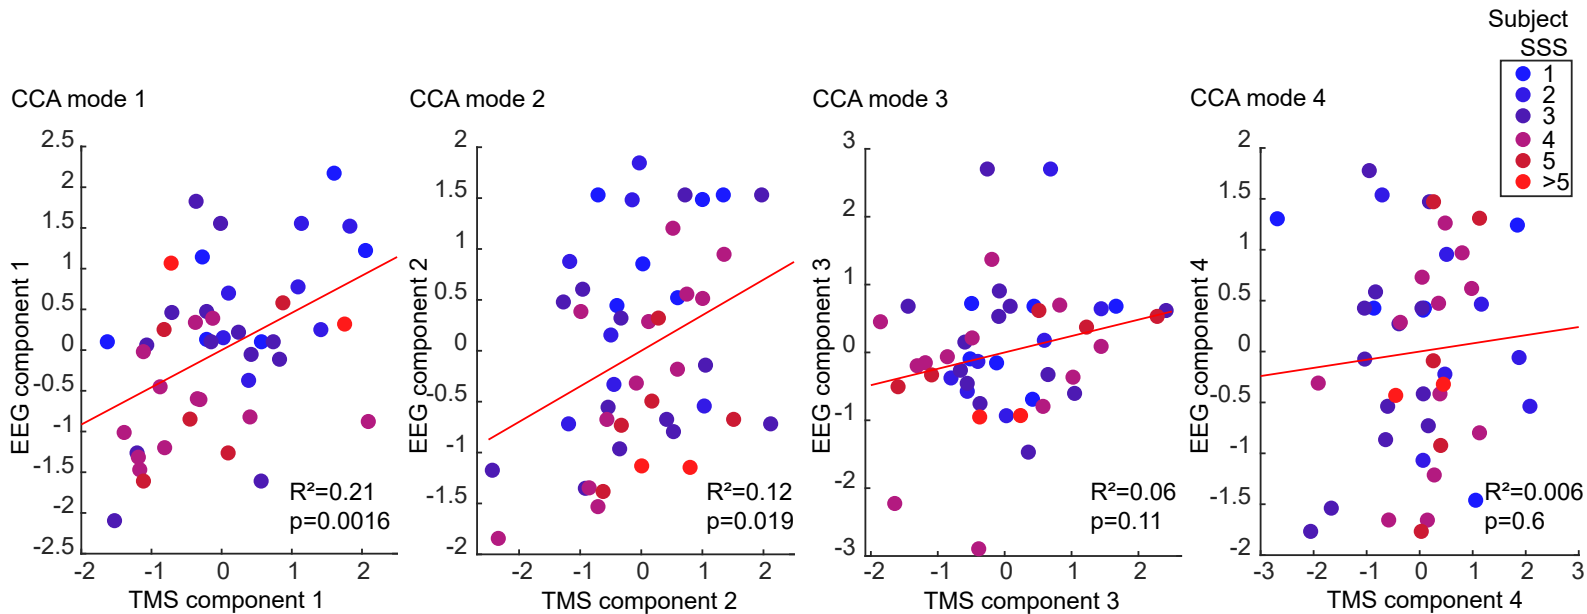

Supplement: supp [file elife-65099-supp-v1.zip]

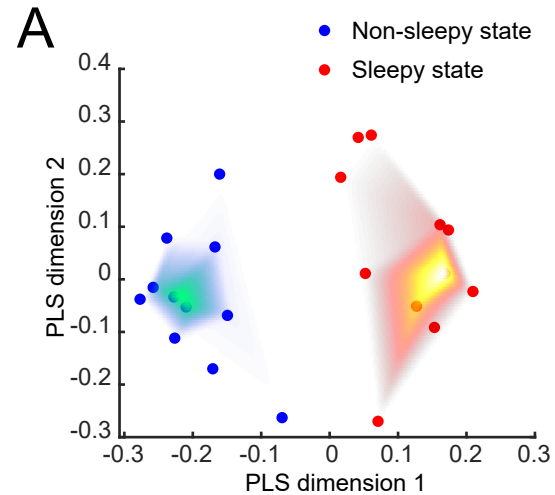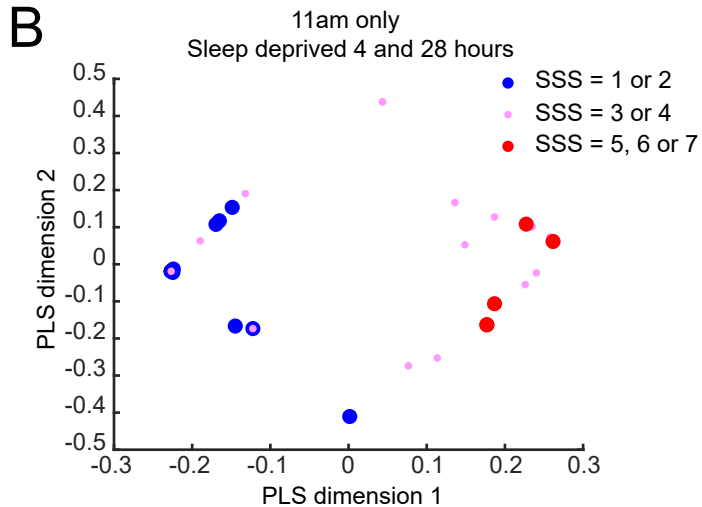

Supplement: supp [file elife-65099-supp-v1.zip]
